# Supplementary material for: Impact of obesity on double-lumen endobronchial tube displacement after lateral decubitus positioning
Source: PubMed Central journal article supplement — Korean J Anesthesiol. 2022 Oct 31;76(3):227–34. doi: 10.4097/kja.22493 (PMC10244602; doi:10.4097/kja.22493), 2022-10-31
Supplement: kja-22493-Supplementary-Table-1.pdf [file kja-22493-Supplementary-Table-1.pdf]

**Supplementary Table 1. Comparison of variables between patients with and without obesity**

|                                     | <b>Non-obese group</b><br>(n = 271) | <b>Obese group</b><br>(n = 157) | <b>P-value</b> |
|-------------------------------------|-------------------------------------|---------------------------------|----------------|
| Age (yr)                            | 62.3 [54.8–68.4]                    | 62.0 [56.1–69.2]                | 0.5            |
| Sex (M/F, <i>n</i> )                | 132 (48.7) / 139 (51.3)             | 83 (52.9) / 74 (47.1)           | 0.4            |
| Height (cm)                         | 162.6 ± 8.2                         | 162.7 ± 9.3                     | 0.9            |
| Weight (kg)                         | 58.9 ± 8.0                          | 74.2 ± 10.1*                    | < 0.001        |
| BMI (kg/m <sup>2</sup> )            | 22.2 ± 1.9                          | 28.0 ± 2.1*                     | < 0.001        |
| Left main bronchus diameter<br>(mm) | 11.8 [11.0–13.0]                    | 11.5 [10.6–12.1]                | 0.9            |
| DLT size ( <i>n</i> )               |                                     |                                 | 0.5            |
| 33 Fr                               | 47 (17.3)                           | 31 (19.7)                       |                |
| 35 Fr                               | 160 (59.0)                          | 94 (59.9)                       |                |
| 37 Fr                               | 64 (23.6)                           | 32 (20.4)                       |                |
| Left lateral decubitus ( <i>n</i> ) | 166 (61.3)                          | 93 (59.2)                       | 0.7            |
| Supine DLT depth (cm)               | 27.0 [25.8–28.5]                    | 26.8 [25.0–28.0]*               | 0.03           |
| H/D <sub>supine</sub>               | 6.0 [5.8–6.2]                       | 6.1 [5.9–6.3]*                  | < 0.001        |
| Lateral DLT depth (cm)              | 27.8 [26.3–29.1]                    | 28.0 [26.5–29.3]                | 0.6            |
| H/D <sub>lateral</sub>              | 5.9 [5.7–6.1]                       | 5.8 [5.7–6.0]                   | 0.8            |
| Extent of DLT migration (mm)        | 6.6 [3.2–11.4]                      | 12.7 [7.1–16.8]*                | < 0.001        |
| Proximal migration ( <i>n</i> )     | 171 (63.1)                          | 140 (89.1)*                     | < 0.001        |

Data are presented as the median [interquartile range], number (%), or mean ± standard deviation.

Non-obese group: patients with BMI (body mass index) < 25 kg/m<sup>2</sup>, obese group: patients with BMI ≥ 25 kg/m<sup>2</sup>, DLT: double-lumen endobronchial tube, H/D<sub>supine</sub>: patient height

divided by supine DLT depth,  $H/D_{\text{lateral}}$ : patient height divided by lateral DLT depth, proximal migration: when advancement of the DLT is required to optimize DLT position.

\*  $P < 0.05$ , compared with the non-obese group.
