# Supplementary material for: Impact of obesity on double-lumen endobronchial tube displacement after lateral decubitus positioning
Source: PubMed Central journal article supplement — Korean J Anesthesiol. 2022 Oct 31;76(3):227–34. doi: 10.4097/kja.22493 (PMC10244602; doi:10.4097/kja.22493), 2022-10-31
Supplement: kja-22493-Supplementary-Table-2.pdf [file kja-22493-Supplementary-Table-2.pdf]

**Supplementary Table 2. Predictive power of selected variables for DLT displacement when BMI, instead of obesity, is assessed in the multivariable analysis**

|                             | Univariable analysis |         | Multivariable analysis |         |
|-----------------------------|----------------------|---------|------------------------|---------|
|                             | OR (95% CI)          | P-value | OR (95% CI)            | P-value |
| Age                         | 1.0 (0.97–1.02)      | 0.7     |                        |         |
| Sex (F)                     | 1.32 (0.73–2.36)     | 0.4     |                        |         |
| BMI                         | 1.28 (1.17–1.41)*    | < 0.001 | 1.26 (1.15–1.38)*      | < 0.001 |
| Obesity                     | 6.56 (3.38–12.75)*   | < 0.001 |                        |         |
| Left main bronchus diameter | 0.79 (0.64–0.98)*    | 0.03    | 0.85 (0.65–1.09)       | 0.2     |
| DLT size                    |                      | 0.1     |                        |         |
| 35 vs. 33 Fr                | 0.33 (0.03–3.94)     | 0.4     |                        |         |
| 37 vs. 33 Fr                | 0.32 (0.03–3.62)     | 0.4     |                        |         |
| 37 vs. 35 Fr                | 0.11 (0.01–1.48)     | 0.09    |                        |         |
| Supine DLT depth            | 0.77 (0.66–0.90)*    | 0.001   | 1.10 (0.86–1.42)       | 0.4     |
| H/D <sub>supine</sub>       | 10.84 (4.01–29.31)*  | < 0.001 | 8.12 (2.89–22.87)*     | < 0.001 |
| Left operation side         | 0.88 (0.49–1.58)     | 0.7     |                        |         |

DLT (double-lumen endobronchial tube) displacement: migration of the DLT > 15 mm after LDP (lateral decubitus positioning), OR: odds ratio, CI: confidence interval, BMI: body mass index, obesity: BMI  $\geq$  25 kg/m<sup>2</sup>, H/D<sub>supine</sub>: patient height divided by supine DLT depth.

\* P < 0.05.
