# Supplementary material for: Impact of obesity on double-lumen endobronchial tube displacement after lateral decubitus positioning
Source: PubMed Central journal article supplement — Korean J Anesthesiol. 2022 Oct 31;76(3):227–34. doi: 10.4097/kja.22493 (PMC10244602; doi:10.4097/kja.22493), 2022-10-31
Supplement: kja-22493-Supplementary-Table-3.pdf [file kja-22493-Supplementary-Table-3.pdf]

**Supplementary Table 3. Predictive power of selected variables for DLT displacement when BMI and H/D<sub>supine</sub> are introduced as dichotomous variables**

|                                 | Univariable analysis |         | Multivariable analysis |         |
|---------------------------------|----------------------|---------|------------------------|---------|
|                                 | OR (95% CI)          | P-value | OR (95% CI)            | P-value |
| Age                             | 1.0 (0.97–1.02)      | 0.7     |                        |         |
| Sex (F)                         | 1.32 (0.73–2.36)     | 0.4     |                        |         |
| BMI $\geq$ 25 kg/m <sup>2</sup> | 6.56 (3.38–12.75)*   | < 0.001 | 6.08 (3.09–11.95)*     | < 0.001 |
| Left main bronchus diameter     | 0.79 (0.64–0.98)*    | 0.03    | 0.83 (0.67–1.04)       | 0.10    |
| DLT size                        |                      | 0.1     |                        |         |
| 35 vs. 33 Fr                    | 0.33 (0.03–3.94)     | 0.4     |                        |         |
| 37 vs. 33 Fr                    | 0.32 (0.03–3.62)     | 0.4     |                        |         |
| 37 vs. 35 Fr                    | 0.11 (0.01–1.48)     | 0.09    |                        |         |
| Supine DLT depth                | 0.77 (0.66–0.90)*    | 0.001   | 0.96 (0.77–1.19)       | 0.7     |
| H/D <sub>supine</sub> > 6       | 3.69 (1.84–7.39)*    | 0.001   | 2.91 (1.41–6.02)*      | 0.004   |
| Left operation side             | 0.88 (0.49–1.58)     | 0.7     |                        |         |

DLT (double-lumen endobronchial tube) displacement: migration of the DLT > 15 mm after LDP (lateral decubitus positioning), OR: odds ratio, CI: confidence interval, BMI: body mass index, H/D<sub>supine</sub>: patient height divided by supine DLT depth.

\* P < 0.05.
